# Supplementary material for: Differential Vulnerability of Oculomotor Versus Hypoglossal Nucleus During ALS: Involvement of PACAP
Source: PubMed Central journal article supplement (PMC7432287; doi:10.3389/fnins.2020.00805), 2020-08-11
Supplement: Table_1.pdf [file Table_1.pdf]

| Gene Symbol (Rattus) | CN3/4 versus CN12 and Cervical spinal cord (Hedlund et al 2010) | Gene Symbol (HUMAN) | SALS1 vs CTRL (Aronica et al 2015) | SALS2 vs CTRL (Aronica et al 2015) |
|----------------------|-----------------------------------------------------------------|---------------------|------------------------------------|------------------------------------|
| Krt18                | 62.3                                                            | KRT18               | 1.8                                | 2.9                                |
| Fkhr                 | 48.5                                                            | FOXO1               | 1.5                                | -                                  |
| <b>Gda</b>           | <b>41.5</b>                                                     | GDA                 | -                                  | -2.1                               |
| Cart                 | 41.2                                                            | CARTPT              | 2.9                                | -                                  |
| <b>Gda</b>           | <b>39.7</b>                                                     | GDA                 | -                                  | -2.1                               |
| Rtnn                 | 37.4                                                            | RTTN                | -                                  | -                                  |
| Otx2                 | 33.8                                                            | OTX2                | -                                  | -                                  |
| Dpt                  | 24.5                                                            | DPT                 | -                                  | -4.1                               |
| Igsf1                | 23.7                                                            | IGSF1               | -                                  | -                                  |
| Spint2               | 22.9                                                            | SPINT2              | -                                  | -4.4                               |
| Lamb1                | 21.4                                                            | LAMB1               | 2.6                                | -                                  |
| Bcl11B               | 18.3                                                            | BCL11B              | -4.2                               | -1.8                               |
| Irs4                 | 17.7                                                            | IRS4                | -                                  | 3.8                                |
| Lrit1                | 17.6                                                            | LRIT1               | -                                  | -                                  |
| Ctsc                 | 17.3                                                            | CTSC                | -                                  | -                                  |
| RGD1306410 (Ccz1)    | 16.5                                                            | CCZ1                | -                                  | -                                  |
| Rcn3                 | 15.2                                                            | RCN3                | -                                  | 2.8                                |
| Arpp-21              | 14.9                                                            | ARPP21              | -                                  | -                                  |
| Cyp26B1              | 14.3                                                            | CYP26B1             | -                                  | -2.7                               |
| Enc1                 | 12.7                                                            | ENC1                | -                                  | -5.1                               |
| Wbp5                 | 12.6                                                            | WBP5                | 1.9                                | -                                  |
| Synpr                | 12.3                                                            | SYNPR               | -                                  | -                                  |
| Fchsd2               | 12.1                                                            | FCHSD2              | -                                  | -2.7                               |
| Irx2/Irx1            | 12.1                                                            | IRX1                | -1.9                               | -                                  |
| Necab1               | 12.0                                                            | NECAB1              | -                                  | -3.9                               |
| Coch                 | 11.9                                                            | COCH                | -                                  | -                                  |
| Syt1                 | 11.6                                                            | SYT1                | -                                  | -3.7                               |
| RGD1559587           | 11.4                                                            | -                   | -                                  | -                                  |
| Pitx2                | 11.3                                                            | PITX2               | -                                  | -                                  |
| Cplx3                | 11.0                                                            | CPLX3               | -                                  | -3.6                               |
| Cd63                 | 10.4                                                            | CD63                | 2                                  | -3                                 |
| Foxp2                | 10.3                                                            | FOXP2               | -                                  | 4.4                                |
| LOC68829 (Pde6g)     | 10.2                                                            | PDE6G               | -                                  | -                                  |
| Slc13A4              | 10.2                                                            | SLC13A4             | -                                  | -                                  |
| Irx1                 | 9.8                                                             | IRX1                | -1.9                               | -                                  |
| Dhrsx                | 9.8                                                             | DHRSX               | -                                  | -                                  |
| Ywhae/Doc2B          | 9.7                                                             | YWHAE               | 2.2                                | -3.1                               |
| <b>Gucy1A3</b>       | <b>9.6</b>                                                      | GUCY1A3             | -                                  | -2.5                               |

|                              |     |           |      |      |
|------------------------------|-----|-----------|------|------|
| Ankrd28                      | 9.5 | ANKRD28   | -    | -2.2 |
| Grp                          | 9.4 | GRP       | -    | -2.2 |
| Adcyap1                      | 9.3 | ADCYAP1   | -    | -2.1 |
| RGD1307215<br>(Arpp21)       | 9.1 | ARPP21    | -    | -    |
| Ssg1<br>(Ccdc80)             | 9.0 | CCDC80    | 2    | -    |
| RGD131081<br>9 (Cracdl)      | 8.8 | CRACDL    | -    | -    |
| Rbp3                         | 8.8 | RBP3      | -    | -    |
| Rreb1                        | 8.6 | RREB1     | -3.5 | -    |
| Rgs16                        | 8.4 | RGS16     | -    | -2.2 |
| Gad1                         | 8.2 | GAD1      | -    | -2.8 |
| Etv1                         | 8.2 | ETV1      | -    | -    |
| H2-T23                       | 8.1 | HLA-E     | 3.3  | -2.6 |
| Cd1D1                        | 8.1 | CD1D      | -    | -    |
| Ifitm1                       | 8.0 | IFITM1    | -    | -3   |
| Egr3/Bin3                    | 8.0 | EGR3/BIN3 | -    | -    |
| Plac9                        | 7.9 | PLAC9     | -    | -    |
| Opcml                        | 7.8 | OPCML     | -    | -3.9 |
| Cpne7                        | 7.7 | CPNE7     | -    | -1.9 |
| Anxa1                        | 7.7 | ANXA1     | 2.4  | -    |
| Kit                          | 7.7 | KIT       | -    | -    |
| Ywhae/Doc2<br>B              | 7.7 | YWHAE     | 2.2  | -3.1 |
| Col1A2                       | 7.7 | COL1A2    | -    | -    |
| Oprm1                        | 7.7 | OPRM1     | -    | -    |
| Xtrp3                        | 7.6 | SLC6A20   | -2.7 | -    |
| Bcl11B                       | 7.6 | BCL11B    | -4.2 | -1.8 |
| Slc6A7                       | 7.6 | SLC6A7    | -    | -    |
| LOC498549<br>/RGD13087<br>72 | 7.6 | AKAP11    | -    | -4.5 |
| Cmya5                        | 7.6 | CMYA5     | -    | -3.1 |
| Eef1A1                       | 7.6 | EEF1A1    | 3.1  | -2.8 |
| Lrrc38                       | 7.5 | LRRC38    | -    | 5.6  |
| G3Bp                         | 7.4 | G3BP1     | 2.2  | -    |
| Kcnf1                        | 7.4 | KCNF1     | 2.9  | -    |
| Cap2                         | 7.3 | CAP2      | 2.2  | -    |
| Rgs5                         | 7.3 | RGS5      | -    | -5.8 |
| Dcn                          | 7.2 | DCN       | -    | -3.3 |
| Tmem178                      | 7.1 | TMEM178A  | -    | -    |
| Ptgds                        | 7.1 | PTGDS     | -    | -3   |
| Slc39A4                      | 7.0 | SLC39A4   | -    | 3.8  |
| Cnr1                         | 7.0 | CNR1      | -    | -1.7 |
| Ccnd2                        | 7.0 | CCND2     | -    | -4.1 |
| Gch                          | 6.7 | GCH       | -    | 4.6  |
| Rasal1                       | 6.7 | RASAL1    | -    | -    |

|                        |            |            |      |      |
|------------------------|------------|------------|------|------|
| LOC687064<br>(Col25a1) | 6.7        | COL25A1    | -    | 2.4  |
| Igf1                   | 6.7        | IGF1       | -    | -    |
| Eps8L2                 | 6.6        | EPS8L2     | -    | 2.3  |
| Foxa2                  | 6.6        | FOXA2      | -    | -3.2 |
| Fstl4                  | 6.6        | FSTL4      | -    | -    |
| Myoz3/Synp<br>o        | 6.5        | SYNPO      | -    | -2.4 |
| Eef1A1                 | 6.5        | EEF1A1     | 3.7  | -3.2 |
| Prrg2                  | 6.5        | PRRG2      | -    | 1.9  |
| Upp1                   | 6.5        | UPP1       | -    | -2.2 |
| Fam132A                | 6.4        | FAM132A    | 1.5  | 1.9  |
| RGD131025<br>1 (Mzb1)  | 6.4        | MZB1       | -    | -    |
| LOC690445              | 6.4        | -          | -    | -    |
| RGD130503<br>8         | 6.4        | -          | -    | -    |
| Accn4                  | 6.4        | ASIC4      | -    | -    |
| Calb1                  | 6.3        | CALB1      | -    | -    |
| Gas7                   | 6.3        | GAS7       | -    | -2   |
| Fscn2                  | 6.3        | FSCN2      | -    | -    |
| Arhgef5                | 6.3        | ARHGEF5    | -    | 3.7  |
| Dsc2                   | 6.2        | DSC2       | -    | -2.7 |
| Bk                     | 6.2        | KNG1       | -    | -    |
| <b>Egr1</b>            | <b>5.2</b> | EGR1       | -    | -    |
| <b>Igf2</b>            | <b>2.5</b> | IGF2       | -    | -3.2 |
| Hoxc5                  | 383.3      | HOXC5      | -    | -    |
| Hoxd3/Hox<br>d1        | 78.9       | HOXD1      | -    | -2.3 |
|                        |            | HOXD3      | -    | -2.6 |
| Hoxc8                  | 47.1       | HOXC8      | -    | 3.7  |
| Hoxc8                  | 44.4       | HOXC8      | -    | 3.7  |
| Crygn                  | 42.9       | CRYGN      | -    | 3.3  |
| Hoxd8/Hox<br>d4        | 39.3       | HOXD8/HOXD | -    | -    |
| Hoxb5                  | 37.8       | HOXB5      | -    | -    |
| Hoxa5                  | 37.5       | HOXA5      | -    | -    |
| Hoxb4                  | 26.6       | HOXB4      | -    | -    |
| RGD156143<br>1 (Hoxa3) | 15.8       | HOXA3      | -2   | 2    |
| Hoxb2                  | 15.3       | HOXB2      | -4   | 3.7  |
| Calca                  | 15.1       | CALCB      | -    | -    |
| Hoxa5                  | 14.0       | HOXA5      | -    | -    |
| Hoxc4                  | 11.9       | HOXC4      | -    | -    |
| Trim58/Olr1<br>433     | 11.8       | TRIM58     | -2.8 | -2.8 |
| Fyxd7                  | 11.5       | -          | -    | -    |
| Myh13                  | 11.3       | MYH13      | -    | 6.1  |
| Hoxd4                  | 10.8       | HOXD4      | -    | -    |

|                       |      |                  |      |            |
|-----------------------|------|------------------|------|------------|
| Gfra1                 | 10.3 | GLRA1            | -    | -          |
| Rspo3                 | 10.1 | RSPO3            | -    | -          |
| Hspb1                 | 9.7  | HSPB1            | 2.2  | -2.5       |
| Bcl3                  | 9.6  | BCL3             | 1.8  | -          |
| Pcdhgb7               | 8.4  | PCDHGB7          | -    | -          |
| Trpv2                 | 8.0  | TRPV2            | -    | -1.8       |
| Gabra2                | 7.6  | GABRA2           | -    | -2.3       |
| Pde4Dip               | 7.5  | PDE4DIP          | 3.2  | -2.23      |
| Gbx2/RGD1<br>559780   | 7.2  | GBX2             | -    | 26.75      |
| Epha5                 | 7.1  | EPHA5            | -    | 5.5        |
| Nhlrc2/Adrb<br>1      | 7.0  | NHLRC2/A<br>DRB1 | -    | -          |
| Gabra2/Gabr<br>g1     | 6.9  | GABRG1           | -    | -          |
| Tppp3                 | 6.6  | TPPP3            | 3.5  | 2.5        |
| RGD156330<br>3        | 6.6  | -                | -    | -          |
| Ldoc1                 | 6.6  | LDOC1            | -    | -          |
| LOC360570<br>(Myo18a) | 6.6  | MYO18A           | -    | -          |
| Pai2A                 | 6.5  | SERPINB2         | -2.6 | -          |
| Angptl1/Rsp<br>o2     | 6.4  | ANGPTL1          | -    | 7.1        |
| Meis2/LOC6<br>87952   | 6.4  | MEIS2            | 1.7  | 2          |
| Cd24                  | 6.3  | CD24             | -    | -1.6       |
| Slc35d3               | 6.3  | SLC35D3          | -    | -          |
| LOC688954             | 6.3  | -                | -    | -          |
| RGD156214<br>2        | 6.3  | HOXB6            | -    | 2.8        |
| Cln4-2                | 6.3  | CLCN4            | 1.4  | -          |
| Trem2                 | 6.3  | TREM2            | 3.1  | -          |
| Bcl3                  | 6.1  | BCL3             | 1.8  | -          |
| Kcna1                 | 6.1  | KCNA1            | -    | -          |
| RGD156332<br>7        | 5.9  | -                | -    | -          |
| Hod                   | 5.8  | HOPX             | 1.9  | -4.9       |
| St6Gal1               | 5.7  | ST6GAL1          | 1.9  | -          |
| Trhr                  | 5.7  | TRHR             | -    | -1.9       |
| Htr2A                 | 5.6  | HTR2A            | -    | -2.8       |
| RGD130699<br>1        | 5.6  | LAMP5            | -    | -          |
| Sh3Bgrl3              | 5.6  | SH3BGRL3         | -    | -2.7       |
| Prph                  | 5.5  | PRPH             | -    | -2.3       |
| Mtmr2                 | 5.5  | MTMR2            | -    | -2.6       |
| Casc3                 | 5.5  | CASC3            | -    | -2         |
| Chrm2/Ptn             | 5.5  | CHRM2<br>PTN     | -    | 4.27<br>-3 |
| Frem3                 | 5.4  | FREM3            | -    | -          |

|                              |     |                 |          |             |
|------------------------------|-----|-----------------|----------|-------------|
| Scx                          | 5.4 | SCX             | -        | -           |
| Wdr33                        | 5.4 | WDR33           | 1.7      | -           |
| Fbxo36                       | 5.3 | FBXO36          | -        | 4.3         |
| Clic3                        | 5.3 | CLIC3           | -        | 4.4         |
| Epha3                        | 5.3 | EPHA3           | -        | 3.5         |
| Atp2B3                       | 5.3 | ATP2B3          | 1.8      | -3.3        |
| RGD156367<br>8               | 5.1 | -               | -        | -           |
| LOC682060<br>/RGD15647<br>33 | 5.1 | -               | -        | -           |
| Rab3B                        | 5.1 | RAB3B           | -        | -4.3        |
| RGD156237<br>8               | 5.1 | H4C15; H4C13    | -        | -           |
| A3Galt2/Zfp<br>362           | 5.0 | ZNF362          | -        | -2.5        |
| Gas6                         | 5.0 | GAS6            | -        | 2.08        |
| RGD156241<br>1/Rps6Kb1       | 5.0 | RPS6KB1         | 1.5      | -           |
| Mocs3/Kcng<br>1              | 5.0 | MOCS3/KCNG      | -        | -3.1        |
| Chrm2/Ptn                    | 5.5 | CHRM2<br>PTN    | -<br>-   | 4.27<br>-3  |
| Tmem16C                      | 4.9 | ANO3            | -        | -2.2        |
| Parva                        | 4.9 | PARVA           | 2        | -           |
| S100A10                      | 4.9 | S100A10         | 2.8      | -           |
| RGD156058<br>7               | 4.9 | EPHA4           | -        | -2.1        |
| Itga7                        | 4.8 | ITGA7           | 2.2      | -           |
| RGD156597<br>5/Irx3          | 4.8 | IRX3            | -1.6     | 3.6         |
| Pmp22                        | 4.8 | PMP22           | -        | -3.4        |
| Slc16A13                     | 4.7 | SLC16A13        | -        | -           |
| Vipr2                        | 4.7 | VIPR2           | -        | -           |
| Ogfrl1                       | 4.7 | OGFRL1          | 1.6      | -           |
| Megf11                       | 4.7 | MEGF11          | -        | -           |
| Cacna1B                      | 4.6 | CACNA1B         | -        | -4.5        |
| Pcdh17                       | 4.6 | PCDH17          | -        | -2.1        |
| Ykt6                         | 4.6 | YKT6            | 2.5      | -           |
| Foxk2                        | 4.6 | FOXK2           | 2        | -           |
| Mmp28                        | 4.5 | MMP28           | -        | -2.9        |
| Efna1/Efna3                  | 4.5 | EFNA1<br>EFNA3  | 1.7<br>- | -2.4<br>2.9 |
| Lphn3                        | 4.5 | LPHN3           | -        | -           |
| Susd2                        | 4.5 | SUSD2           | -        | -2.4        |
| Senp5                        | 4.4 | SENP5           | -        | -2.4        |
| Lamp2/Atp1<br>B4             | 4.4 | LAMP2<br>ATP1B4 | -<br>-   | -3.4<br>9.9 |

|            |            |         |      |       |
|------------|------------|---------|------|-------|
| Sncg       | 4.4        | SNCG    | -    | -     |
| Fam159B    | 4.4        | FAM159B | -    | -     |
| Ppm2C      | 4.4        | PPM2C   | -    | -4.8  |
| Stbd1      | 4.4        | STBD1   | -    | 8.14  |
| Dysf       | 4.4        | DYSF    | -1.8 | -     |
| Bace2/Mx1  | 4.3        | BACE2   | -    | -3.6  |
|            |            | MX1     | -    | -3.05 |
| LOC679020  | 4.3        | -       | -    | -     |
| <b>Pgf</b> | <b>3.5</b> | PGF     | -    | -     |
